# Supplementary material
Source: publisher figshare collection journal article supplement (https://karger.figshare.com/articles/dataset/_/8005868)
Supplement: Supplementary file 1 [file 1 › AUD499154_sm1.pdf]

# Supplementary Material 1: Individual patient data

**Table 1:** individual experimental data

| CI    | Patient | Electrode | Test |      |      |      |            | Re-test |      |      |      |            | Insertion angle | Stakhovskaya reference | Cochlear reference |         |
|-------|---------|-----------|------|------|------|------|------------|---------|------|------|------|------------|-----------------|------------------------|--------------------|---------|
|       |         |           | Run1 | Run2 | Run3 | Run4 | Geom. mean | Run1    | Run2 | Run3 | Run4 | Geom. mean |                 |                        | Test               | Re-test |
| CI422 | Pt 1    | 3         | 3333 | 3667 | 1667 | 2333 | 2626       | 3500    | 3000 | 3500 | 2500 | 3096       | 29,21           | 12358                  | 5676               | 5676    |
|       |         | 7         | 3500 | 958  | 1333 | 958  | 1438       | 1000    | 1500 | 1000 | 1500 | 1225       | 95,50           | 5945                   | 3304               | 3304    |
|       |         | 11        | 708  | 1083 | 1000 | 958  | 926        | 1250    | 1000 | 1000 | 875  | 1023       | 161,46          | 3643                   | 1934               | 1934    |
|       |         | 15        | 1333 | 1167 | 1083 | 917  | 1115       | 438     | 1000 | 1000 | 1250 | 860        | 228,02          | 2157                   | 1124               | 1124    |
|       |         | 19        | 354  | 792  | 667  | 708  | 603        | 312     | 1000 | 875  | 1500 | 800        | 290,99          | 1315                   | 622                | 622     |
| CI422 | Pt 2    | 3         | 7000 | 6667 | 6000 | 6333 | 6489       | 7500    | 7500 | 6000 | 6500 | 6844       | 14,49           | 14610                  | 7421               | 7421    |
|       |         | 7         | 583  | 667  | 3167 | 583  | 921        | 4000    | 1375 | 1625 | 1625 | 1952       | 53,05           | 9425                   | 3988               | 3988    |
|       |         | 11        | 375  | 542  | 396  | 250  | 377        | 438     | 562  | 469  | 469  | 482        | 110,29          | 5327                   | 2117               | 2117    |
|       |         | 15        | 354  | 417  | 292  | 208  | 308        | 562     | 469  | 500  | 562  | 522        | 174,70          | 3301                   | 1124               | 1124    |
|       |         | 19        | 229  | 438  | 198  | 250  | 265        | 375     | 500  | 406  | 469  | 435        | 253,98          | 1751                   | 622                | 622     |
| CI422 | Pt 3    | 3         | 1125 | 1250 | 1000 | 1500 | 1205       | 500     | 750  | 812  | 688  | 677        | 43,88           | 10461                  | 5676               | 5676    |
|       |         | 7         | 1250 | 1250 | 1125 | 1625 | 1300       | 500     | 812  | 625  | 750  | 660        | 95,88           | 5929                   | 3304               | 3304    |
|       |         | 11        | 625  | 938  | 812  | 812  | 788        | 812     | 500  | 438  | 406  | 518        | 154,71          | 3830                   | 1934               | 1934    |
|       |         | 15        | 500  | 1125 | 500  | 812  | 691        | 875     | 406  | 500  | 750  | 604        | 218,88          | 2322                   | 1124               | 1124    |
|       |         | 19        | 688  | 469  | 375  | 438  | 480        | 469     | 500  | 500  | 500  | 492        | 298,90          | 1240                   | 622                | 622     |
| CI422 | Pt 4    | 3         | 6500 | 7000 | 8000 | 8000 | 7346       | 3750    | 6000 | 6500 | 6500 | 5553       | 74,29           | 7404                   | 5676               | 5676    |
|       |         | 7         | 1750 | 2750 | 6500 | 1625 | 2670       | 750     | 4500 | 2250 | 1500 | 1837       | 135,21          | 4427                   | 3304               | 3304    |
|       |         | 11        | 875  | 219  | 875  | 938  | 630        | 1250    | 875  | 1375 | 3000 | 1457       | 205,88          | 2578                   | 1934               | 1934    |
|       |         | 15        | 234  | 156  | 172  | 141  | 172        | 500     | 141  | 203  | 234  | 241        | 282,94          | 1397                   | 1124               | 1124    |
|       |         | 19        | 141  | 125  | 125  | 141  | 133        | 125     | 156  | 125  | 125  | 132        | 355,98          | 809                    | 622                | 622     |
| CI422 | Pt 5    | 3         | 4000 | 4000 | 3750 | 4000 | 3936       | 3500    | 3500 | 4000 | 4000 | 3742       | 94,63           | 5984                   | 5676               | 5676    |
|       |         | 7         | 2750 | 1625 | 3250 | 3500 | 2670       | 3000    | 3000 | 2500 | 2000 | 2590       | 150,79          | 3943                   | 3304               | 3304    |
|       |         | 11        | 812  | 812  | 938  | 938  | 873        | 938     | 1875 | 1250 | 875  | 1178       | 223,92          | 2229                   | 1934               | 1934    |
|       |         | 15        | 812  | 500  | 875  | 1000 | 772        | 562     | 562  | 562  | 2000 | 772        | 308,82          | 1151                   | 1124               | 1124    |
|       |         | 19        | 469  | 438  | 750  | 406  | 500        | 625     | 438  | 469  | 469  | 495        | 419,64          | 620                    | 622                | 622     |
| CI422 | Pt 6    | 3         | 4500 | 3250 | 1125 | 2250 | 2467       | 1125    | 875  | 500  | 1250 | 886        | 51,54           | 9588                   | 5676               | 5676    |
|       |         | 7         | 234  | 812  | 312  | 406  | 394        | 938     | 1500 | 562  | 625  | 838        | 105,16          | 5533                   | 3304               | 3304    |
|       |         | 11        | 234  | 625  | 234  | 234  | 299        | 625     | 938  | 1000 | 469  | 724        | 178,42          | 3212                   | 1934               | 1934    |
|       |         | 15        | 375  | 500  | 500  | 344  | 424        | 500     | 375  | 500  | 438  | 450        | 263,62          | 1620                   | 1124               | 1124    |
|       |         | 19        | 250  | 281  | 562  | 438  | 363        | 500     | 438  | 344  | 438  | 426        | 348,90          | 853                    | 622                | 622     |
| CI422 | Pt 7    | 3         | 875  | 1625 | 1375 | 1625 | 1335       | 5000    | 2750 | 5500 | 4500 | 4295       | 75,34           | 7316                   | 5676               | 5676    |
|       |         | 7         | 562  | 938  | 1375 | 312  | 690        | 875     | 1125 | 688  | 406  | 724        | 143,40          | 4165                   | 3304               | 3304    |
|       |         | 11        | 688  | 234  | 438  | 1625 | 582        | 344     | 344  | 344  | 688  | 409        | 221,04          | 2282                   | 1934               | 1934    |
|       |         | 15        | 250  | 250  | 312  | 250  | 264        | 469     | 344  | 312  | 406  | 378        | 316,63          | 1086                   | 1124               | 1124    |
|       |         | 19        | 250  | 234  | 234  | 156  | 215        | 125     | 141  | 141  | 141  | 137        | 446,88          | 557                    | 622                | 622     |
| CI422 | Pt 8    | 3         | off  | off  | off  | off  | off        | off     | off  | off  | off  | off        | off             | off                    | off                | off     |
|       |         | 7         | 1750 | 1500 | 1750 | 1375 | 1585       | 2250    | 1000 | 469  | 2250 | 1241       | 4,57            | 16354                  | 4548               | 5358    |
|       |         | 11        | 1500 | 438  | 438  | 562  | 634        | 469     | 312  | 469  | 141  | 314        | 52,22           | 9515                   | 2368               | 2802    |
|       |         | 15        | 438  | 344  | 250  | 281  | 321        | 156     | 188  | 172  | 141  | 163        | 118,71          | 5004                   | 999                | 1683    |
|       |         | 19        | 469  | 250  | 250  | 203  | 278        | 156     | 141  | 156  | 141  | 148        | 186,88          | 3003                   | 622                | 677     |

Continued:

| CI    | Patient | Electrode | Exp1 |      |      |      |            | Exp2 |      |      |      |            | Insertion angle | Stakhovskaya reference | Cochlear reference |      |
|-------|---------|-----------|------|------|------|------|------------|------|------|------|------|------------|-----------------|------------------------|--------------------|------|
|       |         |           | Run1 | Run2 | Run3 | Run4 | Geom. mean | Run1 | Run2 | Run3 | Run4 | Geom. mean |                 |                        | Exp1               | Exp2 |
| CI512 | Pt 9    | 3         | 4000 | 5000 | 6500 | 3500 | 4619       | 6500 | 6500 | 6000 | 5000 | 5967       | 29,12           | 12371                  | 5676               | 5676 |
|       |         | 7         | 1625 | 1875 | 2500 | 3000 | 2186       | 3500 | 1875 | 1875 | 1750 | 2154       | 83,94           | 6635                   | 3304               | 3304 |
|       |         | 11        | 1500 | 1500 | 1500 | 2000 | 1612       | 875  | 1625 | 1500 | 3500 | 1653       | 136,88          | 4372                   | 1934               | 1934 |
|       |         | 15        | 938  | 875  | 1750 | 1750 | 1259       | 1625 | 1625 | 1250 | 1375 | 1460       | 189,00          | 2952                   | 1124               | 1124 |
|       |         | 19        | 312  | 500  | 438  | 406  | 408        | 688  | 875  | 688  | 812  | 762        | 248,77          | 1826                   | 622                | 622  |
| CI512 | Pt 10   | 3         | 938  | 1375 | 750  | 1125 | 1021       | 3500 | 3000 | 3000 | 2250 | 2902       | 37,89           | 11198                  | 5676               | 5676 |
|       |         | 7         | 688  | 688  | 688  | 1000 | 755        | 1750 | 1125 | 1500 | 1500 | 1451       | 113,66          | 5195                   | 3304               | 3304 |
|       |         | 11        | 750  | 688  | 750  | 750  | 734        | 1000 | 1125 | 1500 | 1750 | 1311       | 176,27          | 3263                   | 1934               | 1934 |
|       |         | 15        | 1000 | 625  | 750  | 562  | 716        | 1750 | 625  | 875  | 1250 | 1046       | 233,26          | 2068                   | 1124               | 1124 |
|       |         | 19        | 562  | 812  | 750  | 812  | 726        | 875  | 750  | 875  | 875  | 842        | 290,16          | 1324                   | 622                | 622  |
| CI512 | Pt 11   | 3         | 6000 | 5500 | 4500 | 5000 | 5220       | 5500 | 6000 | 6000 | 6000 | 5871       | 58,65           | 8845                   | 5676               | 5676 |
|       |         | 7         | 2750 | 1750 | 3500 | 3000 | 2666       | 4500 | 3750 | 4500 | 3250 | 3964       | 120,49          | 4938                   | 3304               | 3304 |
|       |         | 11        | 938  | 750  | 875  | 688  | 807        | 3750 | 2750 | 625  | 2500 | 2004       | 171,51          | 3381                   | 1934               | 1934 |
|       |         | 15        | 406  | 562  | 469  | 344  | 438        | 562  | 812  | 562  | 625  | 633        | 216,89          | 2359                   | 1124               | 1124 |
|       |         | 19        | 500  | 312  | 250  | 344  | 340        | 1375 | 625  | 688  | 625  | 780        | 260,98          | 1655                   | 622                | 622  |
| CI512 | Pt 12   | 3         | 3750 | 3500 | 5500 | 5000 | 4359       | 7500 | 5000 | 3500 | 4500 | 4930       | 15,02           | 14522                  | 6486               | 6486 |
|       |         | 7         | 812  | 1500 | 2250 | 1000 | 1287       | 812  | 1375 | 1625 | 469  | 960        | 71,20           | 7668                   | 3680               | 3680 |
|       |         | 11        | 812  | 688  | 625  | 1000 | 769        | 438  | 1500 | 500  | 500  | 637        | 148,16          | 4021                   | 2059               | 2059 |
|       |         | 15        | 625  | 875  | 469  | 344  | 545        | 375  | 812  | 562  | 500  | 541        | 224,68          | 2216                   | 1124               | 1124 |
|       |         | 19        | 438  | 219  | 344  | 344  | 326        | 312  | 312  | 406  | 438  | 363        | 284,94          | 1376                   | 622                | 622  |
| CI512 | Pt 13   | 3         | 7000 | 7500 | 7500 | 7500 | 7372       | 5500 | 7500 | 8000 | 8000 | 7168       | 24,73           | 13005                  | 5676               | 7421 |
|       |         | 7         | 7000 | 6500 | 5000 | 5000 | 5807       | 6000 | 7000 | 6500 | 7000 | 6612       | 79,69           | 6963                   | 3304               | 3988 |
|       |         | 11        | 3000 | 3500 | 3750 | 3750 | 3486       | 4000 | 4000 | 4000 | 4500 | 4120       | 130,85          | 4572                   | 1934               | 2117 |
|       |         | 15        | 1875 | 1750 | 1875 | 3500 | 2154       | 3000 | 1875 | 2500 | 1750 | 2227       | 173,92          | 3321                   | 1124               | 1124 |
|       |         | 19        | 2000 | 1375 | 1125 | 1250 | 1402       | 1375 | 1250 | 1375 | 1125 | 1277       | 213,58          | 2423                   | 622                | 622  |
| CI512 | Pt 14   | 3         | 2500 | 2750 | 3500 | 1875 | 2592       | 469  | 2500 | 2500 | 3250 | 1757       | 170,00          | 3419                   | 5676               | 5676 |
|       |         | 7         | 1000 | 750  | 1875 | 1375 | 1179       | 875  | 1125 | 2000 | 1125 | 1220       | 228,79          | 2144                   | 3304               | 3304 |
|       |         | 11        | 875  | 875  | 688  | 1625 | 962        | 438  | 750  | 1000 | 1000 | 757        | 282,32          | 1403                   | 1934               | 1934 |
|       |         | 15        | 375  | 625  | 562  | 406  | 481        | 938  | 1000 | 1125 | 750  | 943        | 343,28          | 890                    | 1124               | 1124 |
|       |         | 19        | 281  | 188  | 312  | 188  | 236        | 234  | 219  | 312  | 312  | 266        | 408,95          | 647                    | 622                | 622  |

### Legend Table 1:

All data are sorted per patient (page 1: patients 1-8, CI422; page 2: patients 9-14, CI512) and per electrode. The individual data per run per experiment are depicted, with which a geometric mean of the four runs can be calculated. The insertion angle per electrode contact varies per patient, and is depicted in the next column. Based on this insertion angle, a corresponding frequency based on the Stakhovskaya reference (see manuscript text) is calculated. In the next column, the Cochlear references are denoted.

Note that these are the default values for the unmarked cells and are identical for most patients. Numbers in cells with a red background differ from default values, resulting from altered frequency allocations because of switched off electrode contacts. Note that the Cochlear reference can differ per patient between Test and Re-test (Pt 8 and pt 13) electrodes may have been switched off between the experiments. Also note that electrode 3 in Pt 8 is switched off, and therefore has no corresponding Stakhovskaya reference value.

**Table 2:** Exact data of **Figure 3**.

**Table 2a:** geometric means of all patients per electrode.

| CI type | Electrode | Geometric mean of patients (Hz) |         | Mean insertion angle (°) |
|---------|-----------|---------------------------------|---------|--------------------------|
|         |           | Test                            | Re-test |                          |
| CI422   | 3         | 2952                            | 2731    | 54,77                    |
|         | 7         | 1231                            | 1242    | 97,95                    |
|         | 11        | 599                             | 670     | 163,49                   |
|         | 15        | 428                             | 44      | 239,04                   |
|         | 19        | 320                             | 315     | 325,27                   |
| CI512   | 3         | 3564                            | 4299    | 55,90                    |
|         | 7         | 1840                            | 2140    | 116,30                   |
|         | 11        | 1162                            | 1432    | 174,33                   |
|         | 15        | 779                             | 1016    | 230,17                   |
|         | 19        | 471                             | 628     | 284,56                   |

**Legend:**

The geometric means of the data (Table 1 on page 1 of this Supplementary Material) are displayed. These values are the coordinates for the data points in **Figure 3**.

**Table 2b:** geometric means of Stakhovskaya reference and Cochlear reference.

| Electrode | Geometric mean of Stakhovskaya reference line (Hz) | Geometric mean of Cochlear reference line (Hz) |
|-----------|----------------------------------------------------|------------------------------------------------|
| 3         | 10083                                              | 5914                                           |
| 7         | 6376                                               | 3496                                           |
| 11        | 3830                                               | 2002                                           |
| 15        | 2275                                               | 1135                                           |
| 19        | 1386                                               | 624                                            |

**Legend:**

The geometric means of the data (Table 1 on page 1 in this Supplementary Material) are displayed. These values are the coordinates for the data points in **Figure 3**.

Supplementary Material to manuscript:

**Manuscript Title:**

*Comparison of place-versus-pitch mismatch between a perimodiolar and lateral wall cochlear implant electrode array in patients with single-sided deafness and a cochlear implant*

**Authors:**

Jeroen P.M. Peters, Edwin Bennink, Gijsbert A. van Zanten

**Corresponding author:**

Jeroen P.M. Peters, M.D.  
Department of Otorhinolaryngology and Head & Neck Surgery  
University Medical Center Utrecht  
Utrecht, The Netherlands  
Tel: +31 88 75 56644  
E-mail: [h.p.m.peters@umcutrecht.nl](mailto:h.p.m.peters@umcutrecht.nl)
