# Supplementary material
Source: publisher figshare collection journal article supplement (https://karger.figshare.com/articles/dataset/_/8005868)
Supplement: Supplementary file 1 [file 1 › AUD499154_sm2.pdf]

## Supplementary Material 2: Statistics

The complete statistical results are presented per paragraph from the Results section.  
P-values <0.05 are considered statistically significant.

Data analysis was performed using SPSS Statistics software version 22.

### 3.2 Pitch match

| Group | Electrode | 2-sided T-test         |    |       |                    |    |       |
|-------|-----------|------------------------|----|-------|--------------------|----|-------|
|       |           | Stakhovskaya reference |    |       | Cochlear reference |    |       |
|       |           | t                      | df | p     | t                  | df | p     |
| CI422 | 3         | -6.076                 | 13 | 0.000 | -3.519             | 13 | 0.004 |
|       | 7         | -11.668                | 15 | 0.000 | -7.393             | 15 | 0.000 |
|       | 11        | -15.428                | 15 | 0.000 | -9.866             | 15 | 0.000 |
|       | 15        | -11.472                | 15 | 0.000 | -6.659             | 15 | 0.000 |
|       | 19        | -9.959                 | 15 | 0.000 | -4.568             | 15 | 0.000 |
| CI512 | 3         | -5.443                 | 11 | 0.000 | -2.373             | 11 | 0.037 |
|       | 7         | -5.762                 | 11 | 0.000 | -2.799             | 11 | 0.017 |
|       | 11        | -6.011                 | 11 | 0.000 | -2.428             | 11 | 0.034 |
|       | 15        | -5.73                  | 11 | 0.000 | -1.493             | 11 | 0.164 |
|       | 19        | -5.319                 | 11 | 0.000 | -0.788             | 11 | 0.447 |

Two-sided one sample T-test.

### 3.3 Mismatch

#### 3.3.1 Within group comparisons

| Group | E3        | E7        | E11       | E15       | E19       |
|-------|-----------|-----------|-----------|-----------|-----------|
| CI422 | p = 0.735 | p = 0.208 | p = 0.674 | p = 0.779 | p = 0.889 |
| CI512 | p = 0.345 | p = 0.345 | p = 0.463 | p = 0.046 | p = 0.046 |

Wilcoxon signed rank test (between Test and Re-test, per group).

#### 3.3.2 Between group comparisons

| Experiment | E3        | E7        | E11       | E15       | E19       |
|------------|-----------|-----------|-----------|-----------|-----------|
| Test       | p = 0.568 | p = 0.606 | p = 0.039 | p = 0.093 | p = 0.366 |
| Re-test    | p = 0.317 | p = 0.699 | p = 0.039 | p = 0.014 | p = 0.121 |

Mann Whitney U test (between CI422 and CI512 groups, per experiment)

### 3.4 Correlations

| Patient characteristic        | Group             | Relative to Stakhovskaya reference |
|-------------------------------|-------------------|------------------------------------|
| Age                           | CI422             | $R^2 = 0.1318, P = 0.378$          |
|                               | CI512             | $R^2 = 0.1846, P = 0.396$          |
|                               | All patients      | $R^2 = 0.1407, P = 0.187$          |
| Duration of deafness          | CI422             | $R^2 = 0.0005, P = 0.954$          |
|                               | CI512             | $R^2 = 0.1233, P = 0.500$          |
|                               | All patients      | $R^2 = 0.0024, P = 0.870$          |
| Experience with CI at Test    | CI422             | $R^2 = 0.0783, P = 0.502$          |
|                               | CI512             | $R^2 = 0.1917, P = 0.387$          |
|                               | All patients      | $R^2 = 0.0003, P = 0.953$          |
| Experience with CI at Re-test | CI422             | $R^2 = 0.0985, P = 0.449$          |
|                               | CI512             | $R^2 = 0.1302, P = 0.483$          |
|                               | All patients      | $R^2 = 0.0000, P = 0.991$          |
| PTA <sub>be</sub>             | CI422             | $R^2 = 0.4719, P = 0.060$          |
|                               | CI422 (excl Pt 8) | $R^2 = 0.6342, P = 0.032$          |
|                               | CI512             | $R^2 = 0.8259, P = 0.012$          |
|                               | All patients      | $R^2 = 0.3560, P = 0.024$          |
| CVC 3m                        | CI422             | $R^2 = 0.5541, P = 0.034$          |
|                               | CI422 (excl Pt 8) | $R^2 = 0.1709, P = 0.356$          |
|                               | CI512             | $R^2 = 0.2248, P = 0.343$          |
|                               | All patients      | $R^2 = 0.2737, P = 0.055$          |

CVC 3m = Consonant-Vowel-Consonant phoneme score at 3 months after CI-activation for the CI-ear only (better ear masked with masking noise)

PTA<sub>be</sub> = Pure Tone Average of the better ear (500, 1000, 2000 and 4000 Hz).

Supplementary Material to manuscript:

**Manuscript Title:**

*Comparison of place-versus-pitch mismatch between a perimodiolar and lateral wall cochlear implant electrode array in patients with single-sided deafness and a cochlear implant*

**Authors:**

Jeroen P.M. Peters, Edwin Bennink, Gijsbert A. van Zanten

**Corresponding author:**

Jeroen P.M. Peters, M.D.

Department of Otorhinolaryngology and Head & Neck Surgery

University Medical Center Utrecht

Utrecht, The Netherlands

Tel: +31 88 75 56644

E-mail: [h.p.m.peters@umcutrecht.nl](mailto:h.p.m.peters@umcutrecht.nl)
